# Supplementary material for: The single-species metagenome: subtyping Staphylococcus aureus core genome sequences from shotgun metagenomic data
Source: PeerJ journal article supplement (doi:10.7717/peerj.2571), 2016-10-18

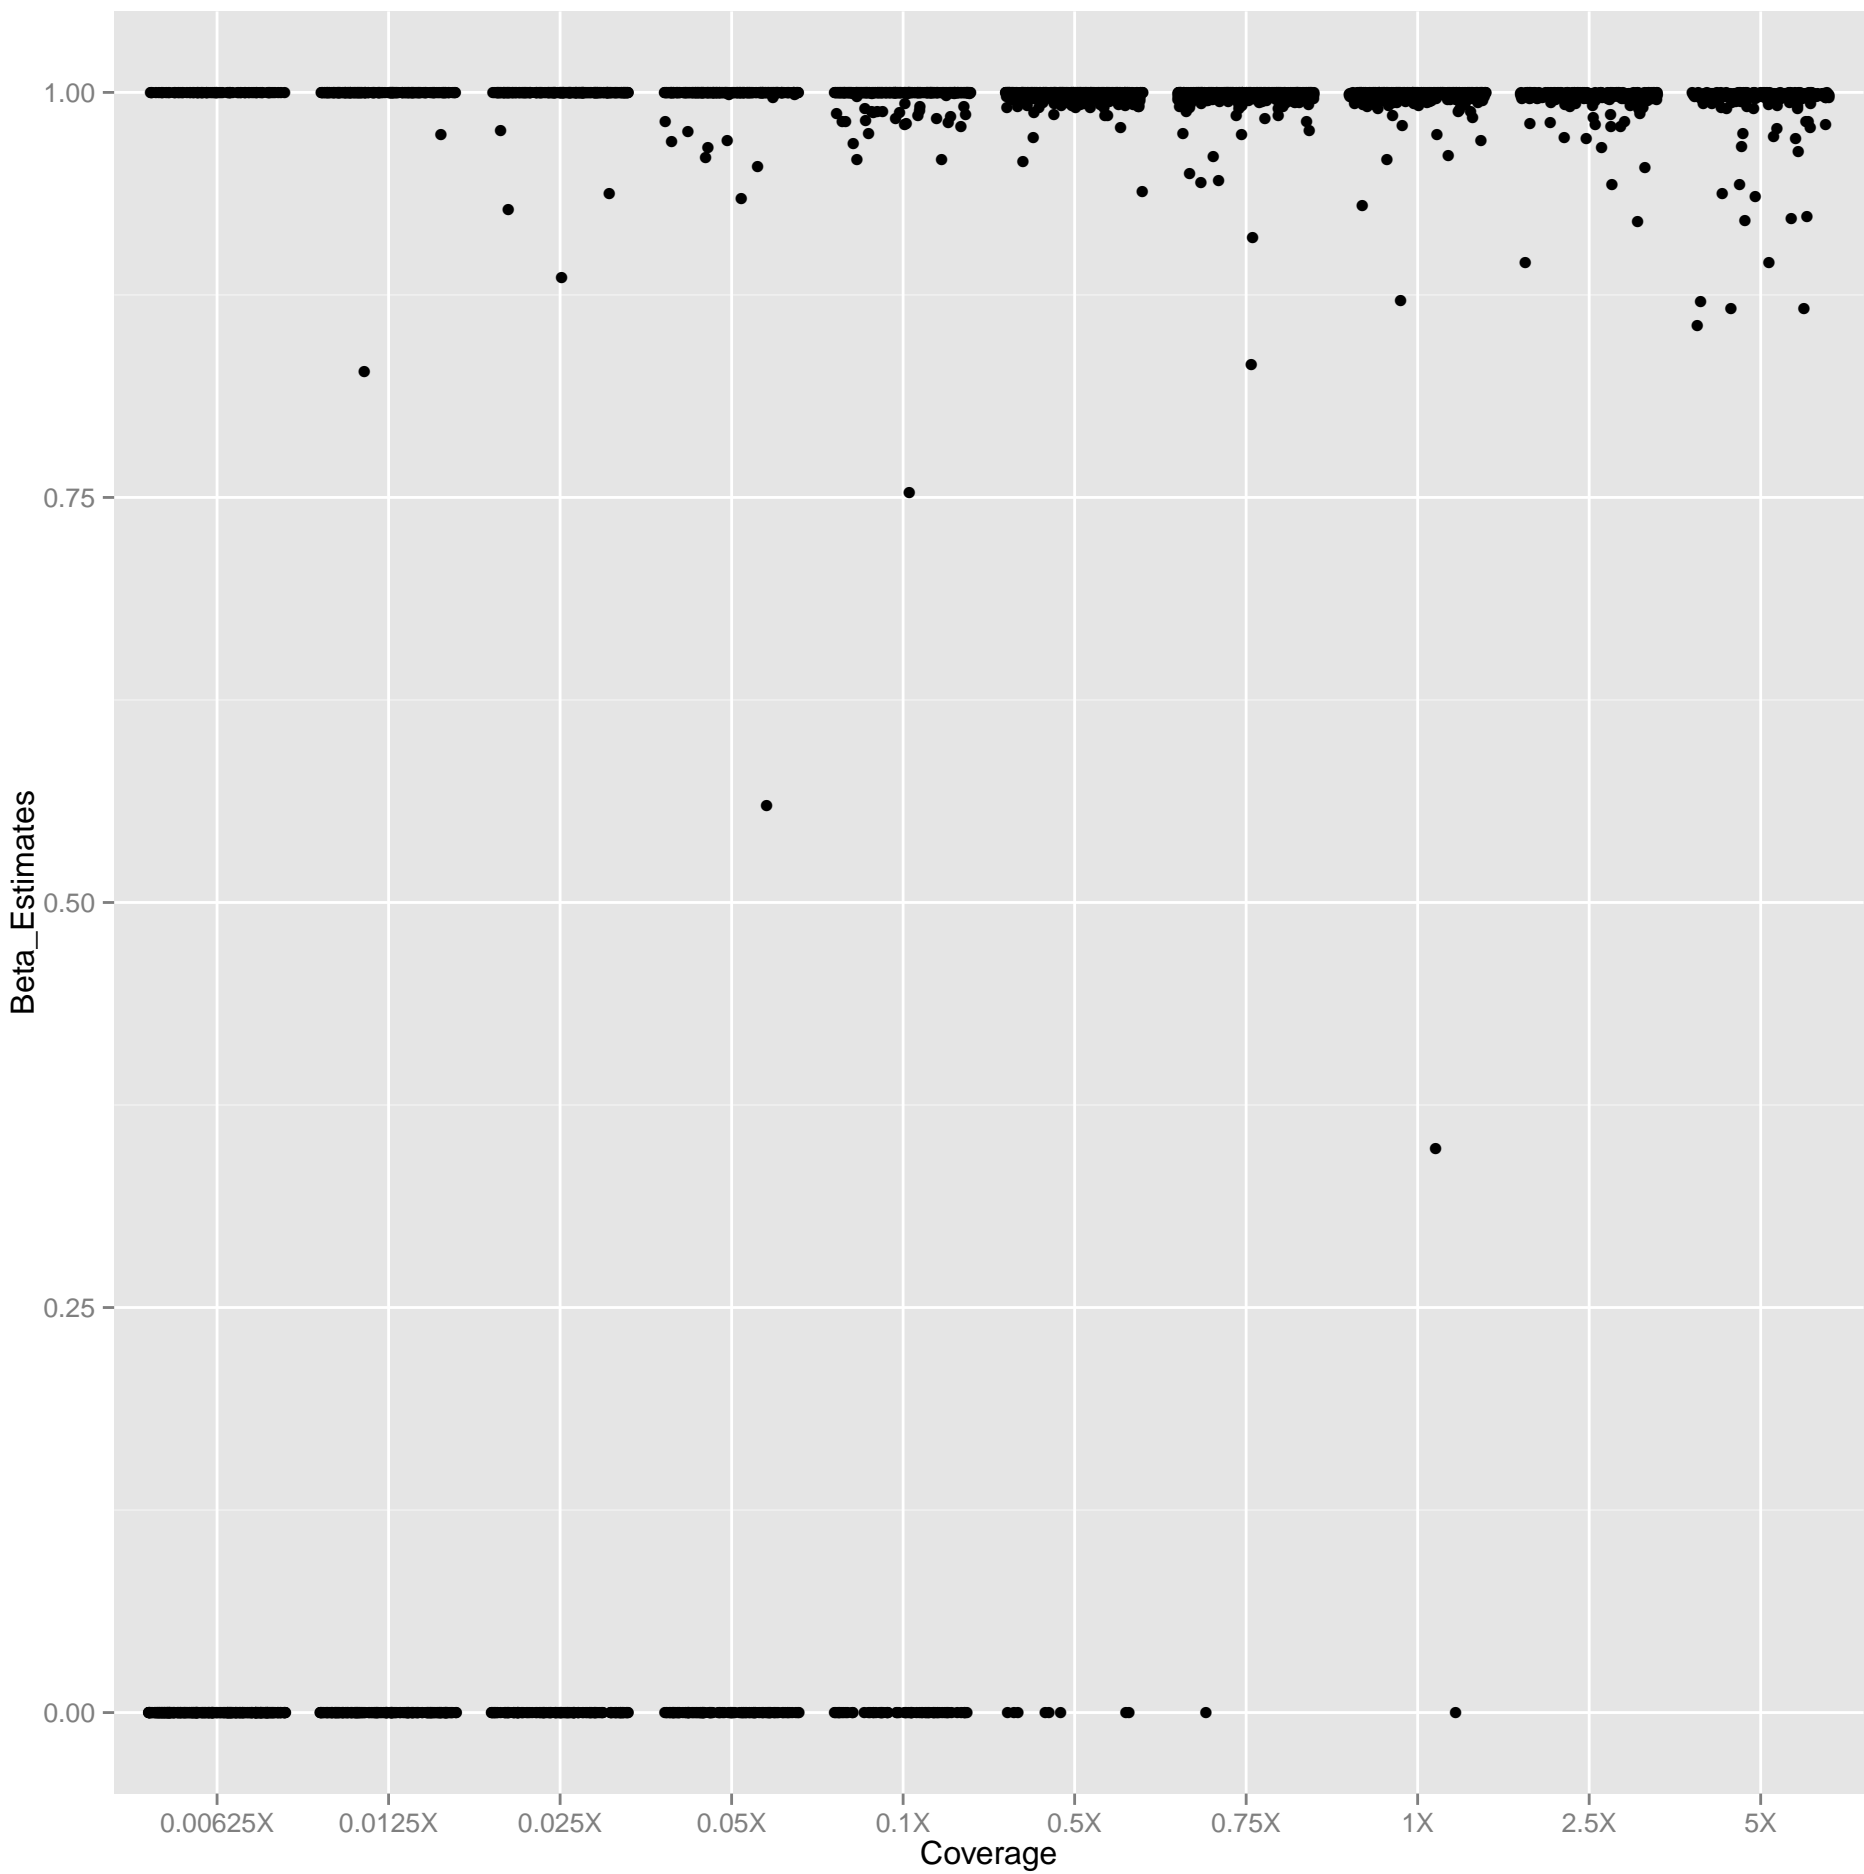

Supplement: S1_Fig.pdf [file S1_Fig.pdf]
