# Supplementary material for: The single-species metagenome: subtyping Staphylococcus aureus core genome sequences from shotgun metagenomic data
Source: PeerJ. 2016 Oct 18;4:e2571. doi: 10.7717/peerj.2571 (PMC5075713; doi:10.7717/peerj.2571)
Supplement: Table S2 [file peerj-04-2571-s007.xlsx]

## Sheet: Sheet1
Supplentary Table 2 . List of the completed 19 S. aureus genomes used to generate the final SNP pattern matrix. These 19 genomes were selected based on fineSTRUCTURE analysis.
Internal Id	fineStructure Population (K=19)	Completed genome	Phenotype	Genome size (bp)	MLST	CC	SCC-Type	Reference	Institute
S24	4	Staph_USA300_TCH1516	MRSA/VSSA		8	8		Highlander et al 2007; BMC Microbiology, 1-14
S01	3	Staph_TW20	MRSA	3043210	239	239	mercury, III	Holden et al 2010; J Bacteriol, 888-892
S05	1	Staph_MW2 (USA400)	CA_MRSA/VSSA		1	1	IV	Baba et al 2002; Lancet, 1819-1827
S06	9	Staph_A9763			5	5		Peleg et al 2012; PLoS One, e28316	Broad Institute
S07	7	Staph_A9765			8	8		Peleg et al 2012; PLoS One, e28316	Broad Institute
S08	11	Staph_ ECT-R2			5	5	II	Lindgvist et al 2012; Eur J Clin Microbiol Infect Dis, 141-147
S14	16	Staph_JKD6159	MRSA	2811435	93	-	IV	Chua et al 2010; J Bacteriol, 5556-5557
S19	10	Staph_N315	MRSA/VSSA		5	5	II	Kuroda et al 2001; Lancet, 1225-1240
S20	19	Staph_M013			59	59	V	Huang et al 2012 ; J Bacteriol, 1256-1257
S22	14	Staph_MRSA252 (Sanger 252)	MRSA		36	30	II	Holden et al 2004; PNAS, 9786-9791
S23	2	Staph_MSSA_130ST72			72	8		Baylor Col Med	Baylor College
S25	6	Staph_A5948			8	8		Peleg et al 2012; PLoS One, e28316	Broad Institute
S31	17	Staph_RF122			151	151		Herron-Olson et al 2007; PLoS One, e1120
S33	5	Staph_Newman			254	8		Baba et al 2008; J Bacteriol, 300-310
S35	13	Staph_ST398	MRSA	2872582	398	398		Schijffelen et al 2010; BMC Genomics 11, 376
S36	15	Staph_TCH60			30	30		Baylor Col Med
S38	12	Staph_MSHR1132			1850	75		Holt et al 2011; Genome Biol Evol, 881-895
S40	8	Staph_A6224	MRSA		5	5		Analyzed by Thomas et al 2012; MBE, 1-12	Broad Institute
S43	18	Staph_ED133			133	133		Guinane et al 2010; Genome Biol Evol, 454-466
List of the 21 fastq files that were processed by denovo assembly and scaffolded into a single chromosome and used to generate the final SNP pattern file.
Internal Id	NCBI SRA Id	Coverage	read length	Mean quality score	MLST	Sequencing Platform
CC_1021	ERX139249	50	100	36.511	1021	Illumina HiSeq 2000
CC_121	ERX505385	50	100	38.353	121	Illumina HiSeq 2000
CC_123	ERX197776	50	100	36.64	123	Illumina HiSeq 2000
CC_130	ERX455857	50	100	38.335	130	Illumina HiSeq 2000
CC_15	ERX513254	50	100	38.015	15	Illumina HiSeq 2000
CC_20	ERX513719	50	100	37.761	20	Illumina HiSeq 2000
CC_2198	ERX154806	50	100	37	2198	Illumina HiSeq 2000
CC_22	ERX085290	50	100	39.496	22	Illumina HiSeq 2000
CC_2361	ERX186303	50	100	35.022	2361	Illumina HiSeq 2000
CC_291	ERX384730	50	100	36.936	291	Illumina HiSeq 2000
CC_425	ERX221170	50	100	37.001	425	Illumina HiSeq 2000
CC_45	ERX197832	50	100	37.002	45	Illumina HiSeq 2000
CC_49	ERX152026	50	100	35.875	49	Illumina HiSeq 2000
CC_50	ERX513678	50	100	37.795	50	Illumina HiSeq 2000
CC_522	ERX522030	50	100	38.169	522	Illumina HiSeq 2000
CC_700	ERX455944	50	100	38.125	700	Illumina HiSeq 2000
CC_779	ERX187560	50	100	36.282	779	Illumina HiSeq 2000
CC_78	ERX187665	50	100	36.715	78	Illumina HiSeq 2000
CC_80	ERX110388	50	100	38.054	80	Illumina HiSeq 2000
CC_97	ERX389171	50	100	38.46	97	Illumina HiSeq 2000
CC_9	ERX513549	50	100	37.823	9	Illumina HiSeq 2000
