# Supplementary material for: The single-species metagenome: subtyping Staphylococcus aureus core genome sequences from shotgun metagenomic data
Source: PeerJ. 2016 Oct 18;4:e2571. doi: 10.7717/peerj.2571 (PMC5075713; doi:10.7717/peerj.2571)
Supplement: Table S3 [file peerj-04-2571-s008.xlsx]

## Sheet: Sheet1
Supplementary Table 3. List of all the exposure variables assessed in this study, which includes the demographics and characteristics of the participants
Exposure Variable	Number present in each of categories of exposure variables used in this study (n)
Main Body Site
Airways	132
Oral	658
Skin	50
missing	0
Diet
Meat/fish/poultry at least 3 days per week	767
Meat/fish/poultry at least 1 day but not more than 2 days per week	14
Eggs/cheese/other dairy products, but no meat/fish/poultry	37
missing	22
Gender
Male	456
Female	384
missing	0
Age
18 - 23 years	181
23 -28 years	398
28 - 33 years	150
33 - 38 years	69
>= 38 years	42
missing	0
Breast Fed or Not
Yes	536
No	158
Don't know/remember	124
missing	22
Tobacco Use
Yes	61
No	779
missing	0
Have Health Insurance or Not
Yes	741
No	59
missing	40
BMI
< 22	206
22 - 25	271
> 25	363
missing	0
RACE
Hispanic	45
Asian	65
Black	51
White	679
missing	0
Whether undergone any type of surgery
Yes	32
No	808
missing	0
