# Supplementary material for: The single-species metagenome: subtyping Staphylococcus aureus core genome sequences from shotgun metagenomic data
Source: PeerJ. 2016 Oct 18;4:e2571. doi: 10.7717/peerj.2571 (PMC5075713; doi:10.7717/peerj.2571)
Supplement: Table S4 [file peerj-04-2571-s009.xlsx]

## Sheet: Sheet1
Supplementary Table 4: Specificity of the v2 subtyping matrix on 2114 S. aureus FASTQ files from the NCBI SRA
		0.025X					0.05X					0.1X					0.5X					0.75X				Highest assigned CC type (reference Genome) on the SNP pattern file
ST	# of samples	>=0.90	>=0.80	>=0.70	>=0.60		>=0.90	>=0.80	>=0.70	>=0.60		>=0.90	>=0.80	>=0.70	>=0.60		>=0.90	>=0.80	>=0.70	>=0.60		>=0.90	>=0.80	>=0.70	>=0.60
1	50	1	1	1	1		1	1	1	1		1	1	1	1		1	1	1	1		1	1	1	1	CC_1
5*	157	0.7156	0.725	0.725	0.725		0.618	0.636	0.6545	0.6545		0.48	0.48	0.48	0.49		0.312	0.3853	0.4128	0.45		0.3181	0.4128	0.44	0.514	CC_5
5*	97	0.7301	0.75	0.75	0.75		0.641	0.666	0.7	0.7		0.6764	0.71	0.71	0.71		0.434	0.54	0.58	0.63		0.452	0.59	0.63	0.74	CC_5
8	141	0.9166	0.9286	0.9405	0.9642		0.9466	0.9466	0.9729	0.9812		0.9615	0.9846	0.9846	0.9846		0.9858	0.9851	1	1		0.9787	0.9787	0.993	0.993	CC_8
15	67	0.9253	0.9402	0.9702	0.985		0.9702	1	1	1		1	1	1	1		0.881	1	1	1		0.806	1	1	1	CC_15
20	9	1	1	1	1		1	1	1	1		1	1	1	1		1	1	1	1		1	1	1	1	CC_20
22	47	1	1	1	1		1	1	1	1		1	1	1	1		1	1	1	1		1	1	1	1	CC_22
30	278	0.954	0.9623	0.9623	0.9748		1	1	1	1		1	1	1	1		1	1	1	1		1	1	1	1	CC_30
45	107	0.73	0.972	1	1		0.7	0.9626	1	1		0.532	0.9626	1	1		0.308	0.972	1	1		0.028	0.9626	1	1	CC_45
49	28	1	1	1	1		1	1	1	1		1	1	1	1		1	1	1	1		1	1	1	1	CC_49
50	6	1	1	1	1		1	1	1	1		1	1	1	1		1	1	1	1		1	1	1	1	CC_50
59	42	1	1	1	1		1	1	1	1		1	1	1	1		1	1	1	1		1	1	1	1	CC_59
72	15	0.9333	1	1	1		0.9333	1	1	1		0.9333	1	1	1		0.9333	1	1	1		0.9333	1	1	1	CC_8_72
80	9	1	1	1	1		1	1	1	1		1	1	1	1		1	1	1	1		1	1	1	1	CC_80
93	231	1	1	1	1		1	1	1	1		1	1	1	1		1	1	1	1		1	1	1	1	CC_93
97	100	0.989	1	1	1		1	1	1	1		1	1	1	1		1	1	1	1		1	1	1	1	CC_97
121	25	1	1	1	1		1	1	1	1		1	1	1	1		1	1	1	1		1	1	1	1	CC_123
123	3	1	1	1	1		1	1	1	1		1	1	1	1		1	1	1	1		1	1	1	1	CC_123
130	90	0.8	0.8	0.8	0.8125		0.8182	0.8182	0.8182	0.8182		0.7941	0.8088	0.8088	0.8088		0.6222	0.6333	0.6333	0.6333		0.8275	0.8735	0.9195	0.9195	CC_130
133	97	1	1	1	1		1	1	1	1		1	1	1	1		1	1	1	1		1	1	1	1	CC_133
151	18	1	1	1	1		1	1	1	1		1	1	1	1		1	1	1	1		1	1	1	1	CC_151
239	179	0.728	0.776	0.784	0.784		0.9615	0.968	0.9743	0.9807		0.9839	0.9943	1	1		0.9385	0.9832	0.9944	1		0.9888	0.9832	1	1	CC_239
254	4	0.75	0.75	0.75	0.75		0.75	0.75	0.75	0.75		1	1	1	1		1	1	1	1		1	1	1	1	CC_8_254
398	174	1	1	1	1		1	1	1	1		1	1	1	1		1	1	1	1		1	1	1	1	CC_398
425	85	1	1	1	1		1	1	1	1		1	1	1	1		1	1	1	1		1	1	1	1	CC_425
522	14	1	1	1	1		1	1	1	1		1	1	1	1		1	1	1	1		1	1	1	1	CC_522
700	13	0.8461	0.923	1	1		0.923	1	1	1		1	1	1	1		1	1	1	1		1	1	1	1	CC_700
779	1	1	1	1	1		1	1	1	1		1	1	1	1		1	1	1	1		1	1	1	1	CC_779
1021	2	1	1	1	1		1	1	1	1		1	1	1	1		1	1	1	1		1	1	1	1	CC_1021
291	5	1	1	1	1		1	1	1	1		1	1	1	1		1	1	1	1		1	1	1	1	CC_291
1850	58	0.9272	0.9454	1	1		0.9855	0.9827	0.9827	1		0.9855	0.9827	1	1		0.9827	0.9827	0.9827	1		0.9827	0.9827	0.9827	1	CC_75_1850
2361	11	1	1	1	1		1	1	1	1		1	1	1	1		1	1	1	1		1	1	1	1	CC_2361
2897	1	1	1	1	1		1	1	1	1		1	1	1	1		1	1	1	1		0	0	0	1	CC_30_36
2898	1	0	0	0	0		1	1	1	1		1	1	1	1		1	1	1	1		1	1	1	1	CC_30_36
2899	1	0	0	0	0		0	0	0	0		0	0	0	0		1	1	1	1		1	1	1	1	Assigned to CC_130 (>0.5X)
2900	1	1	1	1	1		1	1	1	1		1	1	1	1		1	1	1	1		1	1	1	1	Assigned to CC_22
2901	1	1	1	1	1		1	1	1	1		1	1	1	1		1	1	1	1		1	1	1	1	Assigned to CC_30
2905	1	0	0	0	0		0	0	0	0		0	0	0	0		0	0	0	0		1	1	1	1	Not assigned to any group
2907	1	0	0	0	0		0	0	0	0		0	0	0	0		0	0	0	0		0	0	0	0	Not assigned to any group. probably a CC8, but not confident
2908	1	1	1	1	1		1	1	1	1		1	1	1	1		1	1	1	1		1	1	1	1	Assigned to CC_22
2910	2	1	1	1	1		1	1	1	1		1	1	1	1		1	1	1	1		1	1	1	1	Assigned to CC_22
2916	2	1	1	1	1		1	1	1	1		1	1	1	1		1	1	1	1		1	1	1	1	Assigned to CC_22
2917	1	1	1	1	1		1	1	1	1		1	1	1	1		1	1	1	1		0	0	0	1	Assigned to CC_30
2922	1	1	1	1	1		1	1	1	1		1	1	1	1		1	1	1	1		1	1	1	1	assigned to CC_1
2924	1	0	0	0	0		0	0	0	0		0	0	0	0		0	0	0	0		0	0	0	0	Not assigned to any group
2925	2	1	1	1	1		1	1	1	1		1	1	1	1		1	1	1	1		1	1	1	1	Assigned to CC_22
2926	1	1	1	1	1		1	1	1	1		1	1	1	1		1	1	1	1		1	1	1	1	Assigned to CC_22
2934	1	1	1	1	1		1	1	1	1		1	1	1	1		1	1	1	1		1	1	1	1	Assigned to CC_9
2935	1	1	1	1	1		1	1	1	1		1	1	1	1		1	1	1	1		1	1	1	1	Assigned to CC_22
2936	1	1	1	1	1		1	1	1	1		1	1	1	1		0	0	0	1		0	0	0	1	Assigned to CC_30
2938	1	0	0	0	0		1	1	1	1		1	1	1	1		1	1	1	1		1	1	1	1	Assigned to CC_30
2939	1	0	0	0	0		1	1	1	1		1	1	1	1		1	1	1	1		1	1	1	1	Assigned to CC_30
2940	1	1	1	1	1		1	1	1	1		1	1	1	1		1	1	1	1		1	1	1	1	Assigned to CC_45
2944	1	0	0	0	0		1	1	1	1		1	1	1	1		1	1	1	1		1	1	1	1	Assigned to CC_700
The row highligted in yellow shows the specificity of all the 157 SRA samples that were typed as ST5, and the results shown were based on the binstrain estimates based on the data down sampled by selecting low coverages. When binstarin was ran on the full 50X coverage fastq files, 97/157 were assigned to the CC5 bin with the highest beta eastimate.
The row highlighted in green shows the specificity of the 97 CC5 SRA samples that were confirmed as ST5 and the results shown were based on the binstrain estimates on the data down sampled by selecting low coverages.
